# Supplementary material
Source: ML conference proceedings conference paper supplement (https://www.ecva.net/papers/eccv_2022/papers_ECCV/html/136680633_ECCV_2022_paper.php)
Supplement: Supplementary file 2 [file 136680633-supp.zip]

Archive with 4 entries (3 files):
- 0184-supp/
- 0184-supp/0184-supp.pdf
- 0184-supp/0184.mp4
- 0184-supp/README.txt
