# Supplementary material
Source: ML conference proceedings conference paper supplement (https://www.ecva.net/papers/eccv_2022/papers_ECCV/html/136680633_ECCV_2022_paper.php)
Supplement: Supplementary file 2 [file 136680633-supp.zip › 0184-supp/README.txt]

I used general MPEG4 format video which is generated from microsoft powerpoint.
